# Supplementary material for: Chemical Composition, Physical Properties, and Aroma Profile of Ethanol Macerates of Mistletoe (Viscum album)
Source: MDPI journal article supplement (doi:10.3390/beverages8030046), 2022-08-07
Supplement: s1 [file s1]

## Supplementary Materials

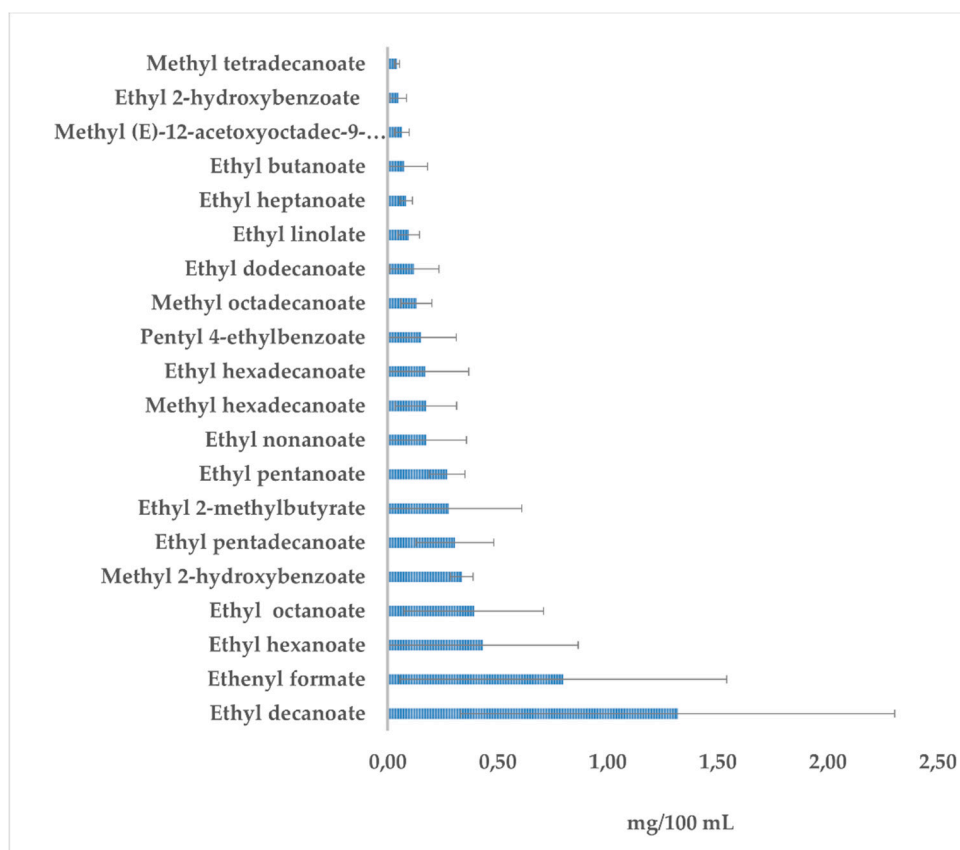

**Figure S1.** Average value and standard deviation of concentrations of esters detected in ethanol/water mistletoe macerate.
